# Supplementary material for: Validation of steroid ratios for random urine by mass spectrometry to detect 5α-reductase deficiency in Vietnamese children
Source: publisher site journal article supplement (doi:10.1515/cclm-2022-0272), 2022-05-23
Supplement: Supplementary file 2 [file j_cclm-2022-0272_suppl.docx]

**Supplemental Table 1.** Designed primers sequence in our study.

| Primers | Sequence (5’🡪 3’) | Length | Tm | Amplification size |
| --- | --- | --- | --- | --- |
| 5ARD-1F | CTTCGTTCTCCTCCGGCCAC | 20 | 59 oC | 601 bp |
| 5ARD-1R | CTGCCTCCTTGGCGTTCCT | 19 | 59 oC |
| 5ARD-2F | GAGCCTGGTTTTTGTACCTTCTG | 23 | 57 oC | 338 bp |
| 5ARD-2R | GGCCATGGCGATGTAGATTGT | 21 | 57 oC |
| 5ARD-3F | CCCACTTTCTGCCACGTCTTAG | 23 | 57 oC | 350 bp |
| 5ARD-3R | TGTATCATTCGTGCCCTCACTGT | 24 | 57 oC |
| 5ARD-4F | GGAACAACACAGATGGGTTTAATG | 24 | 57 oC | 350 bp |
| 5ARD-4R | AATACAAGCCCAGCAAGTCAGA | 22 | 57 oC |
| 5ARD-5F | GTCAGCCACTGCTCCATTATATT | 23 | 59 oC | 446 bp |
| 5ARD-5R | TACTTGGATTGCCCGGTGAA | 21 | 59 oC |
